# Supplementary material
Source: bioRxiv or medRxiv preprint supplement (https://medrxiv.org/highwire/filestream/81676/field_highwire_adjunct_files/0/2020.05.15.20084293-1.pdf)
Supplement: Supplementary file [file 2020.05.15.20084293-1.pdf]

## **ANNEX 1. MEMBERS OF THE COVID 19 CENTRAL DEFENSE HOSPITAL "GÓMEZ ULLA" TEAM**

### Allergy Department:

Regina María Paulaskas Vasati, Enrique Gabriel Gómez González.

### Anaesthesiology Department:

Pelet Pascual, Elvira. García Aroca, Miguel Ángel. Cantalejo Pérez, Francisco. Gago Sánchez, Alberto José. Rodríguez Martín, Ana. Rodríguez Sánchez, Dolores. Tejeda Fernández, Jose Luis. Santos, Elisabeth. Almagro Vidal, Inés. Álvarez Fdez., Lucía. Arranz Pérez, Rodrigo. Cabrera Serrano, Gemma. Fernández Peña, Alberto. González Del Pozo, Irene. Martín Oropesa, Raquel. Monteserín Matesanz, Cristina. Navarro Echevarría, Patricia. Olivera Moreno, Daniel. Vullo, Paula Agostina.

### Cardiology Department:

Salvador Álvarez Antón, Concepción Fernández Pascual, María José Morales, Andrea Rueda Linares, Diego Rodríguez Torres, Carmen de Juan Bitria, Alexander Félix Marschall, Fredy Andrés Delgado Calva, Maria Belen Biscotti Rodil, Ricardo Concepción Suárez, Dámaris Caballeira Puentes.

### Clinical Microbiology Department:

María Simón, María del Carmen Ybarra de Villavicencio, María Simón Sacristán, Maria Isabel Zamora Cintas, Almudena Rodríguez Aranda, Amelia Montserrat Carmona de Cózar, Maria Encarnación Mérida Arias, Jose Luis Martin Prieto.

### Dermatology Department

Leire Sanchez Los Arcos, Cristina Collantes Rodríguez.

### Digestive Medicine Department:

Asunción Ramos Meca, Elena Portales, Marian Ángeles García Mayor, Inmaculada Pérez Amarilla, Mar Rodríguez, Enrique de la Fuente, Gema Arranz, María Jesús Callejo, Natalia Zuberoa Rosado Dawid, Sandra María Caro López, Ana Isabel Sáez Sáez, María Domínguez Rodríguez.

### Emergency Department:

Jaime Rossiñol Ruiz, David Coca Benito, M. Luz Cano Izquierdo, M. Lourdes Rojas Bueno, M. Carmen Reche Caballero, Claudio Escobar Bargeño, Silvia Jiménez Zamora, Alfonso López Chollet, Marta Del Nido Alonso, Margarita Del Moral González, Miguel Muro Fernández, Marta Martín Vallejo, Elena Planchuelo Medina, Gabriel González Salazar, Fátima Ibáñez Estélliz,

Rolando Sordo Díaz, Noelia Arroyo Pardo, Enrique Portela Filgueira, Ana María Martínez Molina, Beatriz Rato Barrio, Ignazio Taronna Latorre, Jessica D. Peña Vásquez, M. Eugenia Zornoza Pérez, María José Noguera Marín, Capitán Antonio Eloy Seva Delgado, Teniente Darlin M. Guzmán Rosario, Teniente Fabián Manjarrés Henríquez, Teniente Alvaro Rodríguez Rodríguez, Ana Betegón Sanz, Miguel Almazor Iribarren, M. Asunción Sánchez Gil, Juan Carlos Sánchez Sánchez-Gil, Dionisio Alastuey Martínez, Gonzalo Infante Pino, Eduardo De Vicente Cano, Estefanía Ruiz Alcaide, Andrea Matas Escamilla.

Endocrinology Service:

Elena Mendoza, Teresa de Grado, Carmen Gil.

General and Digestive Surgery Department:

Oscar Marqueta García, Mariano Javaloyes Rodrigo, Miguel Ángel Sierra Ortega, Maria Isabel Sanchez-Seco Peña, Ignacio García Marirrodriga, Francisco Sanchez del Valle, Antonio Sáez Montoro, Fernando Fernández Bueno, Yusef Mohamed Al Lal, Cristina López Muñoz, Patricia Tejedor Togores, Guillermo Fernández Díaz, Silvia Maestro Prieto, Luis de Nicolás Navas, Juan José Perez Alegre, Pablo Hernández Sanz.

Intensive Care Department:

Jorge Medina Segovia, Paloma Sanchez Mata, Rosario Fernandez Suero, Felix Maimir Jané, Luis Vicente Saenz Casco, Pilar Borrego Jimenez, Francisco Gijón Gallego, Esperanza Molero Silvero, Cesar Eugenio Gaona Coscia, Javier Sainz Cabrajas.

Internal Medicine Department:

María Navarro Téllez, Belén Esteban Lazareno, Raúl Ruiz Esteban, Javier Rodeles Melero, José María Rodríguez Fernández, María Eugenia Segovia, Elsa Labrada, Ana López Aparicio, Alejandro Estrada, Emma de Pablo, Álvaro Conesa, Ainhoa Gutiérrez, Irene Ruiz, Xavier Álvarez Granda, Luisa Jimenez Reyes, Laura Checa, Lidia Romero, Paloma Lucena Calvet, Pedro Priego de Montiano, Francisco de Asís Fernández Riestra, María Antonia Menéndez, Carmen González, Jose Ramón Toral Revuelta, Alba Ibáñez Botella, Pedro Vázquez Jacinto.

Neurology Department:

Manuel Domínguez Salgado, Francisco Valenzuela, María del Rosario Antón Abarca.

Oncology Department:

Carmen Arlanzón, Gabriel Barrena

Paediatrics Department:

Carlota García, Noelia Valero Flores, Andrés Fernández Flores, María García Baró, Paula Polanco Zea, María José Hernández, Helena Viana Llamas.

Pharmacy Department:

María Henar Gonzalo Salado, Francisco Javier Sanchez Jimenez, Francisco José López Honduvilla, Paloma Sánchez López, Pilar Prats Oliván, María Jesús Méndez Fernandez, Laura Pedraza Nieto, Ana Acuña Vega, Andrea Correa Pérez, Paula Granda Lobato.

Pneumology Department:

Francisco Ramón Villegas Fernández, Andrés Rodero Baño, Gabriel J Caballero Rodriguez, Begoña de Juan Rodrigo, María Jesús Chillón, Alberto González Estebanez, Jose Javier Jareño Esteban, Carolin Wagner Struwing, María Castro Otero, Ana Ochoa Ruiz, Salvador de la Torre Carazo, Ángela Hidalgo Herranz, Marta Perez Gallan, Diogenes José Alfonzo Martinez, Soledad Torres Tienza, Silvia Sans Perez, Cristina Yanlli Bonduki, Juan de Mesa, Carmen Lorenzo.

Preventive Medicine Department:

María Vicenta García Rosado, Ana Isabel López Figueras, Pilar Segura Cebollada, María Teresa Ledo Varela.

Hematology Department:

Natalia García León

Psychiatry Department:

Marta Presa García, Victoria Juarez Calvo, Catalina Iglesias García, Cristina Rodriguez Villarino, Daniel Fernández Faber, Maria Plaza Yuste, Celia María Hernández Caro, Jose David Cozar Ortiz, Coral Esperanza Torrente, Cristina Rodriguez Delgado.

Rehabilitation Department:

Carlos Mora Jordá, Rebeca Maruenda Fernández, Ana Tovar Cifuentes, Guillermo Fernández García Ruiz-Calero, María De los Ángeles Rodríguez Gamero, Cristina Novo Navarro, Maria Victoria Lorenzo Suberviola.

Rheumatology Department:

María Ahijón, Raúl Veiga.

Traumatology Department

Javier Areta Jiménez, Jose Luis Bernacer López, Roberto Trapote Sanmartín, Jose Luis Sopesen Veramendi, Marcos Fernandez Gayol, Jose Adolfo Orellana Gomez-Rico, Francisco González Prieto, Ana Arrollo Perez, Montserrat Martinez Roldan, Diana Crego Vita, Carlos Rodríguez Moro, Arturo Muñoz Ruiz, Rafael García Cañas, Raquel Vallez Romero, Ricardo Vethencourt Koifman, Gonzalo Hernandez Fernandez, Ricardo Baños Turza, Irene Portellano Pascual, Nelson Lasluisa Molina, Monica Huecas Martinez, Alberto Granado Llamas, Azucena Martín Herreros, Alfonso Rodriguez Mejías, Serafín Mihanda Eliquya, Felipe Velasco Vaquero, María Prieto Vazquez.

Neurosurgery Department:

Beatriz Mansilla Fernández, Sofía Santiño Gómez, María Teresa Panadero Useros, Alfonso Valencia Moya; Aurora Felipa Molina Foncea.

Vascular Surgery Department:

Noelia Alonso Gómez, Afnan Abdelkader Abu-Sneimeh
